# Supplementary material for: Surface conversion of CuO–ZnO to ZIF-8 to enhance CO2adsorption for CO2hydrogenation to methanol
Source: Royal Society of Chemistry journal article supplement (doi:10.1039/d2nj05832d), 2023-01-01
Supplement: d2nj05832d1.pdf [file d2nj05832d1.pdf]

## Supporting Information

### Surface conversion of CuO-ZnO to ZIF-8 to enhance CO<sub>2</sub> adsorption for CO<sub>2</sub> hydrogenation to methanol

Lei Zhang<sup>a</sup>, Jia Cui<sup>a</sup>, Yue Zhang<sup>a</sup>, Xiaoguang San<sup>a\*</sup>, Dan Meng<sup>a\*</sup>

<sup>a</sup> College of Chemical Engineering, Shenyang University of Chemical Technology, Shenyang 110142, PR China

\*Corresponding authors. Tel./fax: +86 136-5401-9351

Email: sanxiaoguang@syuct.edu.cn (X. San); mengdan0610@hotmail.com (D. Meng)

### Contents

Fig. S1. FTIR spectra of co-precipitated CuO-ZnO, hydrothermal CuO-ZnO and CuO-ZnO@ZIF-8.

Fig. S2. Low-magnification and high-magnification SEM of image (a) CuO-ZnO@ZIF-8(1:2), (b) CuO-ZnO@ZIF-8(1:4) and (c) CuO-ZnO@ZIF-8(1:6).

Fig. S3. HRTEM images of CuO-ZnO@ZIF-8 (1:4).

Fig. S4. Raman spectra of co-precipitated CuO-ZnO, hydrothermal CuO-ZnO and CuO-ZnO@ZIF-8(1:4).

Fig. S5. XPS spectra of CuO-ZnO@ZIF-8(1:4) catalysts: (a) survey XPS spectra of CuO-ZnO@ZIF-8 (b) Zn 2p (c) C 1s(d) N 1s (e) O 1s and (f) Cu 2p.

Fig. S6. TG diagrams (a) and TPR patterns (b) of co-precipitated CuO-ZnO, hydrothermal CuO-ZnO and CuO-ZnO@ZIF-8 catalysts.

Fig. S7. XRD pattern of co-precipitated CuO-ZnO, hydrothermal CuO-ZnO and CuO-ZnO@ZIF-8 after reaction.

Fig. S8. MS spectra of the CO<sub>2</sub> reduction products of CuO-ZnO@ZIF-8 using <sup>12</sup>CO<sub>2</sub> and <sup>13</sup>CO<sub>2</sub>.

Tab. S1. FTIR spectra of the absorption CO<sub>2</sub> (g) features in ZnO and CuO nanoparticle Surface.

Tab. S2. The oxygen vacancies relative concentration ratios by XPS (%).

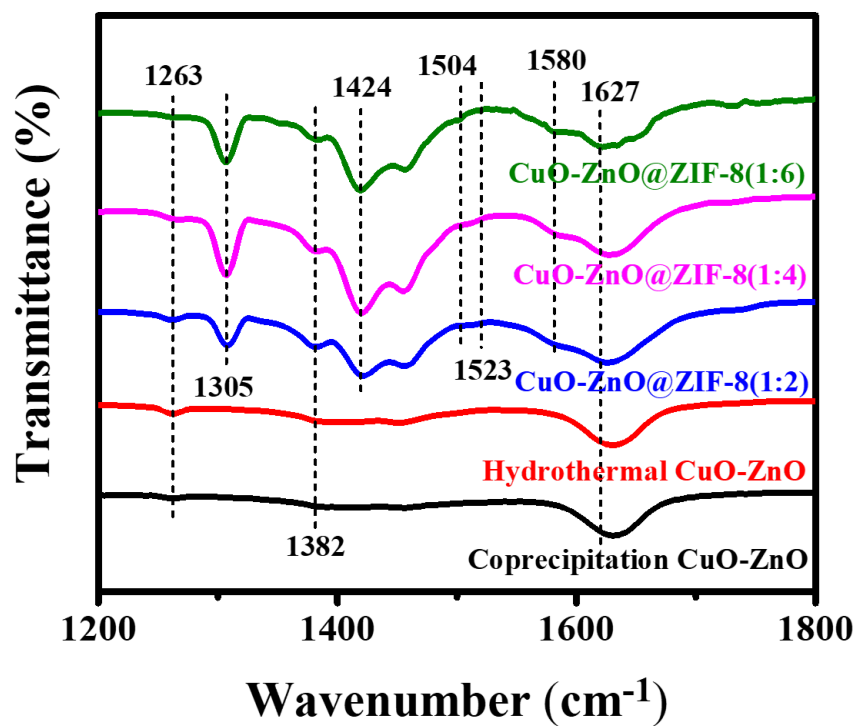

Fig. S1. FTIR spectra of co-precipitated CuO-ZnO, hydrothermal CuO-ZnO and CuO-ZnO@ZIF-8.

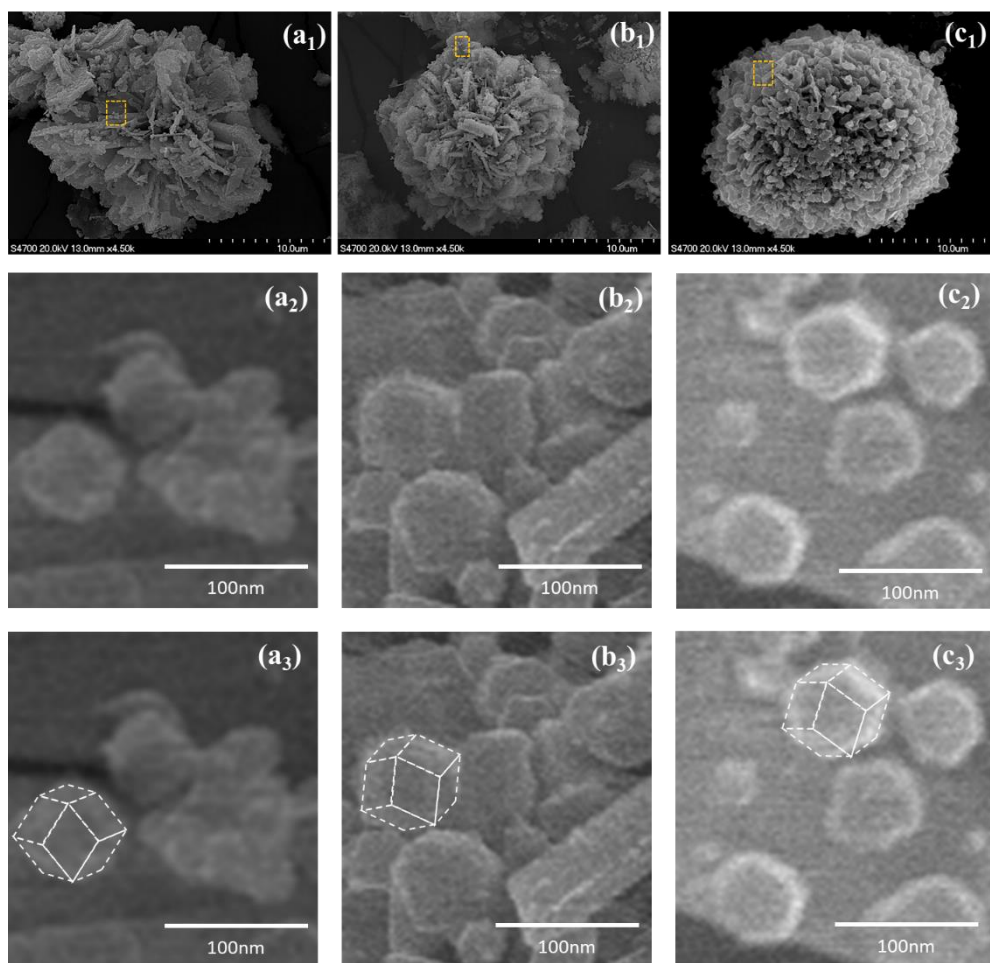

Fig. S2. Low-magnification and high-magnification SEM of image (a) CuO-ZnO@ZIF-8(1:2), (b) CuO-ZnO@ZIF-8(1:4) and (c) CuO-ZnO@ZIF-8(1:6).

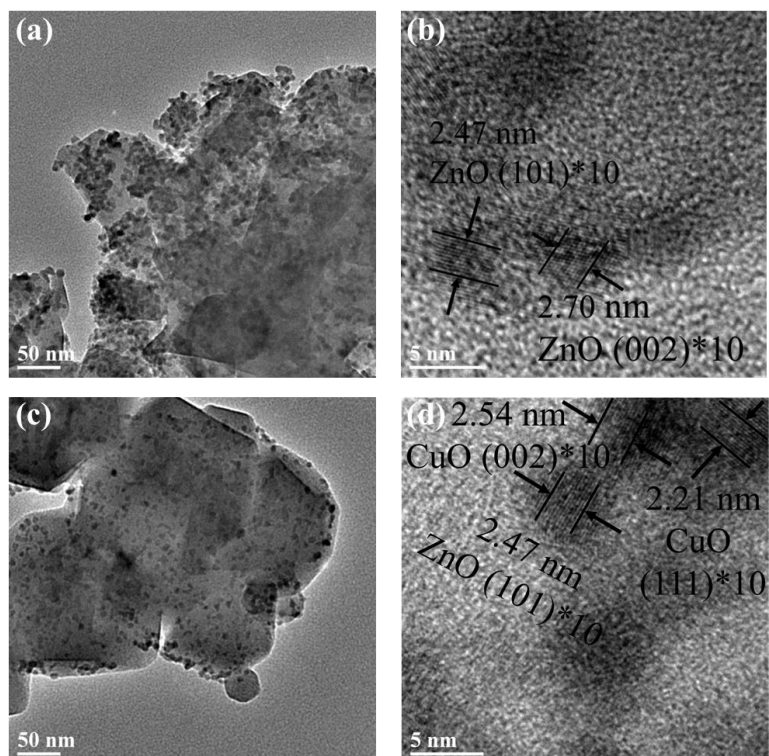

Fig. S3. HRTEM images of CuO-ZnO@ZIF-8 (1:4).

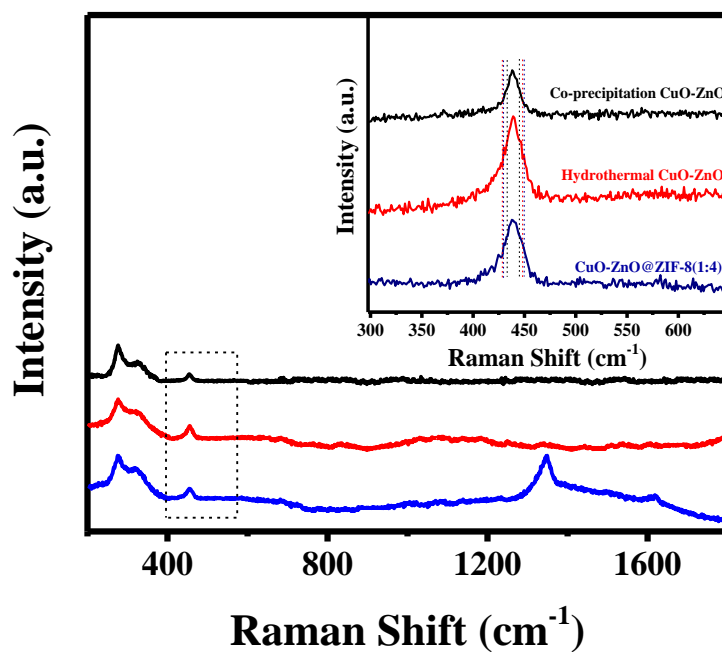

Fig. S4. Raman spectra of co-precipitated CuO-ZnO, hydrothermal CuO-ZnO and CuO-ZnO@ZIF-8(1:4).

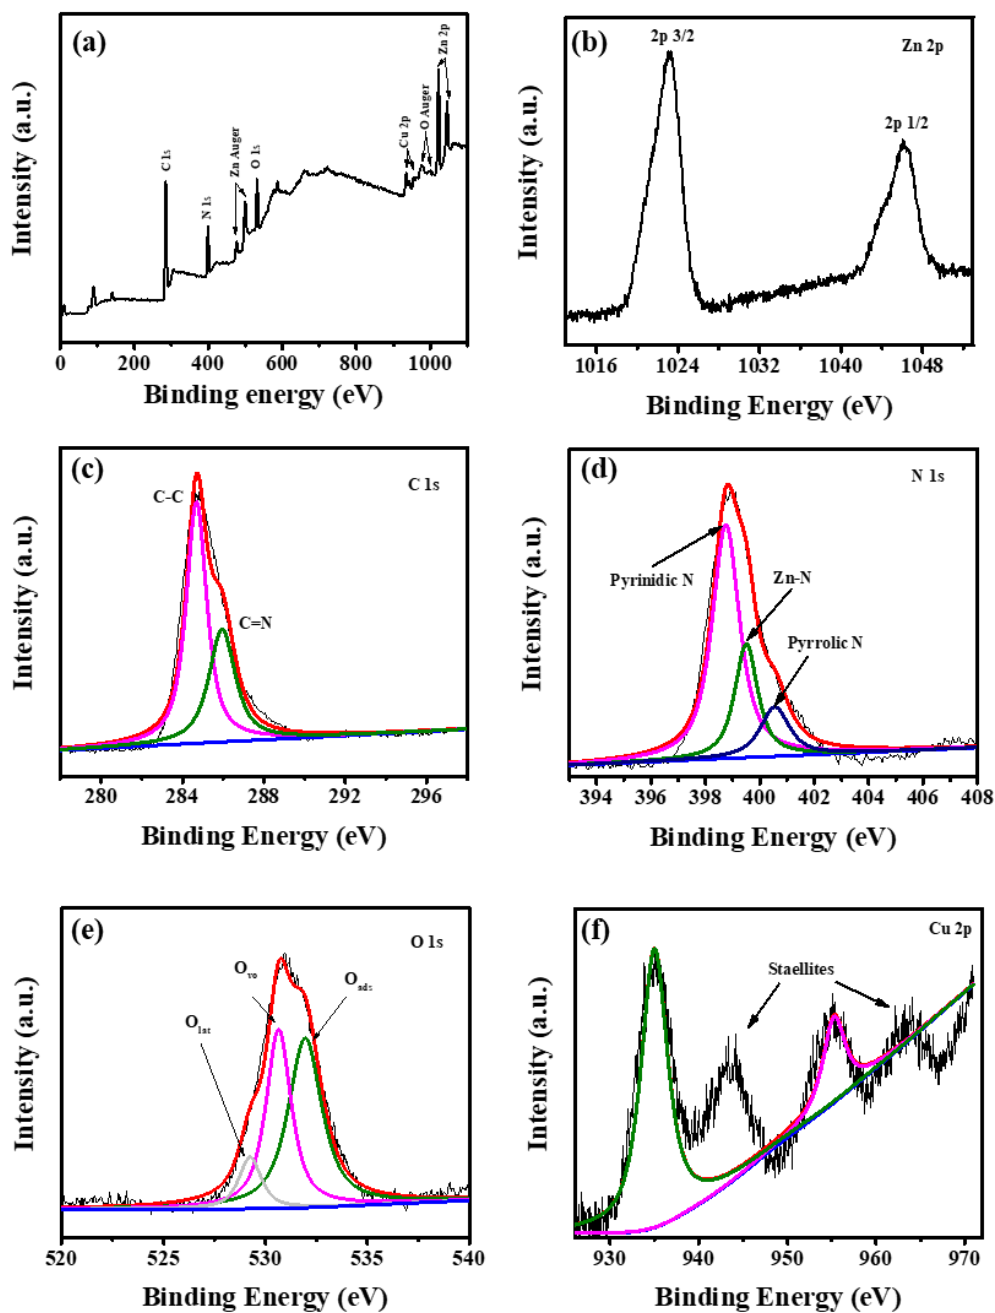

Fig. S5. XPS spectra of CuO-ZnO@ZIF-8(1:4) catalysts: (a) survey XPS spectra of CuO-ZnO@ZIF-8 (b) Zn 2p (c) C 1s (d) N 1s (e) O 1s and (f) Cu 2p.

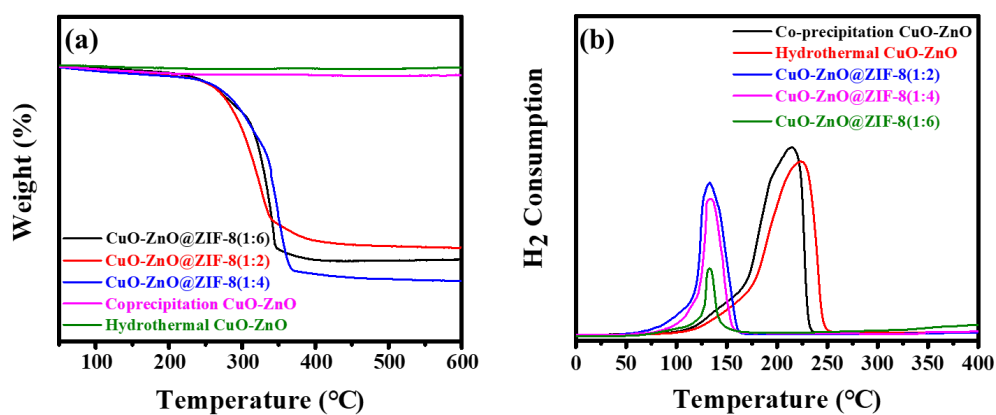

Fig. S6. TG diagrams (a) and TPR patterns (b) of co-precipitated CuO-ZnO, hydrothermal CuO-ZnO and CuO-ZnO@ZIF-8 catalysts.

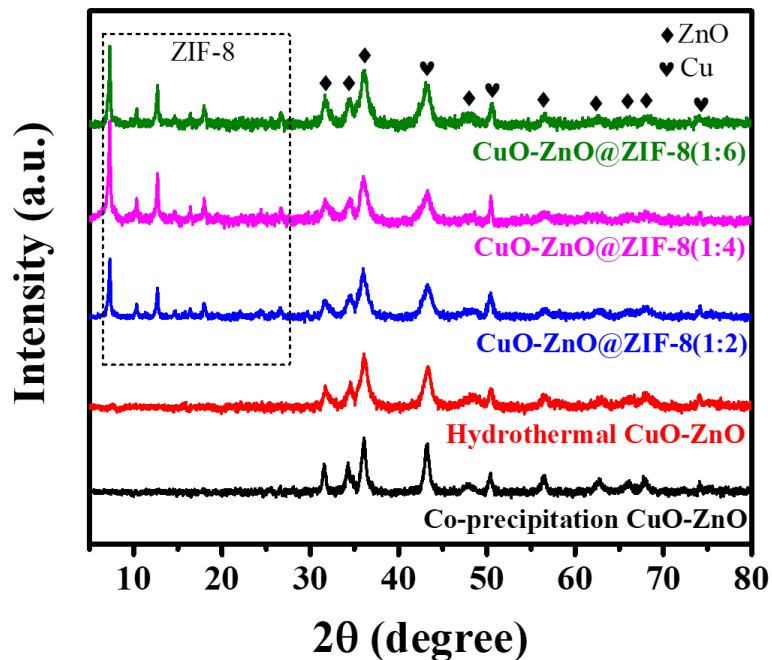

Fig. S7. XRD pattern of co-precipitated CuO-ZnO, hydrothermal CuO-ZnO and CuO-ZnO@ZIF-8 after reaction.

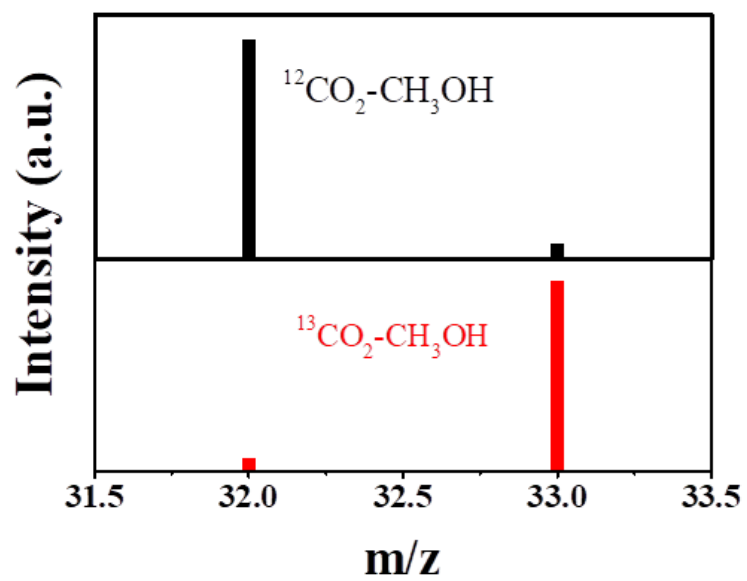

Fig. S8. MS spectra of the  $\text{CO}_2$  reduction products of CuO-ZnO@ZIF-8 using  $^{12}\text{CO}_2$  and  $^{13}\text{CO}_2$ .

Tab. S1.

FTIR spectra of the absorption CO<sub>2</sub> (g) features in ZnO and CuO nanoparticle Surface.

| Vibrational Assignment                                  | Bicarbonate                          |                         | Monodentate carbonate               |                         |                                      |                         | Bidentate carbonate                 |                         |                                      |                         | Carboxylate                          |                         |                            |   |
|---------------------------------------------------------|--------------------------------------|-------------------------|-------------------------------------|-------------------------|--------------------------------------|-------------------------|-------------------------------------|-------------------------|--------------------------------------|-------------------------|--------------------------------------|-------------------------|----------------------------|---|
|                                                         | v <sub>3</sub> (O-C-O) <sub>as</sub> |                         | v <sub>3</sub> (O-C-O) <sub>s</sub> |                         | v <sub>3</sub> (O-C-O) <sub>as</sub> |                         | v <sub>3</sub> (O-C-O) <sub>s</sub> |                         | v <sub>3</sub> (O-C-O) <sub>as</sub> |                         | v <sub>3</sub> (O-C-O) <sub>as</sub> |                         |                            |   |
|                                                         | ZnO (cm <sup>-1</sup> )              | CuO (cm <sup>-1</sup> ) | ZnO (cm <sup>-1</sup> )             | CuO (cm <sup>-1</sup> ) | ZnO (cm <sup>-1</sup> )              | CuO (cm <sup>-1</sup> ) | ZnO (cm <sup>-1</sup> )             | CuO (cm <sup>-1</sup> ) | ZnO (cm <sup>-1</sup> )              | CuO (cm <sup>-1</sup> ) | ZnO (cm <sup>-1</sup> )              | CuO (cm <sup>-1</sup> ) |                            |   |
| CuO-ZnO@ZIF-8(1:6)                                      | 1627                                 | -                       | -                                   | 1424                    | 1504                                 | -                       | 1382                                | -                       | 1580                                 | -                       | 1263                                 | 1305                    | 1523                       | - |
| CuO-ZnO@ZIF-8(1:4)                                      | 1627                                 | -                       | -                                   | 1424                    | 1504                                 | -                       | 1382                                | -                       | 1580                                 | -                       | 1263                                 | 1305                    | 1523                       | - |
| CuO-ZnO@ZIF-8(1:2)                                      | 1627                                 | -                       | -                                   | 1424                    | 1504                                 | -                       | 1382                                | -                       | 1580                                 | -                       | 1263                                 | 1305                    | 1523                       | - |
| Hydrothermal CuO-ZnO                                    | 1631                                 | -                       | -                                   | -                       | -                                    | -                       | 1386                                | -                       | -                                    | -                       | 1263                                 | -                       | -                          | - |
| Coprecipitation CuO-ZnO                                 | 1631                                 | -                       | -                                   | -                       | -                                    | -                       | 1386                                | -                       | -                                    | -                       | 1263                                 | -                       | -                          | - |
| Range of Frequencies (cm <sup>-1</sup> ) <sup>a-e</sup> | 1623-1650 <sup>a</sup>               |                         | 1410-1435 <sup>a</sup>              |                         | 1480-1520 <sup>a-c</sup>             |                         | 1380-1395 <sup>a</sup>              |                         | 1553-1644 <sup>a,b</sup>             |                         | 1243-1355 <sup>a,b</sup>             |                         | 1510-1670 <sup>a,c,d</sup> |   |

a. Ref 1; b. Ref. 2; c. Ref. 3 d. Ref. 4; e. Ref. 5

Tab. S2.

The oxygen vacancies relative concentration ratios by XPS (%).

| Catalyst                | O <sub>Vo</sub> /(O <sub>lat</sub> + O <sub>Vo</sub> + O <sub>ads</sub> ) |
|-------------------------|---------------------------------------------------------------------------|
| Co-precipitation Cu-ZnO | 21                                                                        |
| Hydrothermal CuO-ZnO    | 35                                                                        |
| CuO-ZnO@ZIF-8 (1:4)     | 39                                                                        |



## References

- 1 Baltrusaitis, J.; Schuttlefield, J.; Zeitler, E.; Grassian, V. H. Carbon Dioxide Adsorption on Oxide Nanoparticle Surfaces. *Chem. Engine. J.* **2011**, *170*, 471-481.
- 2 Noei, H.; Woll, C.; Muhler, M.; Wang, Y. Activation of Carbon Dioxide on ZnO Nanoparticles Studied by Vibrational Spectroscopy. *J. Phys. Chem. C* **2011**, *115*, 908-914.
- 3 Shido, T.; Iwasawa, Y. Reactant-Promoted Reaction Mechanism for Water-Gas Shift Reaction on Rh-Doped CeO<sub>2</sub>. *J. Catal.* **1993**, *141*, 71-81.
- 4 Seiferth, O.; Wolter, K.; Dillmann, B.; Klivenyi, G.; Freund, H.-J.; Scarano, D.; Zecchina, A. IR Investigations of CO<sub>2</sub> Adsorption on Chromia Surfaces: Cr<sub>2</sub>O<sub>3</sub> (0001)/Cr (110) versus Polycrystalline  $\alpha$ -Cr<sub>2</sub>O<sub>3</sub>. *Surf. Sci.* **1999**, *421*, 176-190.
- 5 Baltrusaitis, J.; Jensen, J. H.; Grassian, V. H. FTIR Spectroscopy Combined with Isotope Labeling and Quantum Chemical Calculations to Investigate Adsorbed Bicarbonate Formation Following Reaction of Carbon Dioxide with Surface Hydroxyl Groups on Fe<sub>2</sub>O<sub>3</sub> and Al<sub>2</sub>O<sub>3</sub>. *J. Phys. Chem. B* **2006**, *110*, 12005-12016.
